# Supplementary material for: Artesunate Activates the Intrinsic Apoptosis of HCT116 Cells through the Suppression of Fatty Acid Synthesis and the NF-κB Pathway
Source: PubMed Central journal article supplement (PMC6152404; doi:10.3390/molecules22081272), 2017-08-08
Supplement: molecules-22-01272-s001.pdf [file molecules-22-01272-s001.pdf]

**Supplementary Material** - Artesunate activates the intrinsic apoptosis of HCT116 cells through the suppression of fatty acid synthesis and the NF- $\kappa$ B pathway

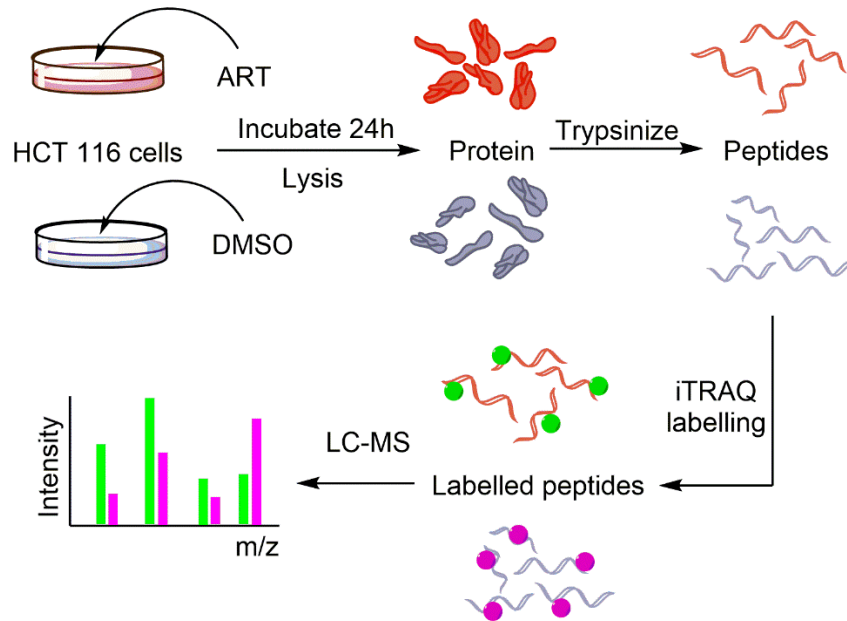

**Figure S1** General workflow of iTRAQ coupled with LC-MS/MS

**Table S1** up-regulated proteins list

| Accession No. | Name                                                                    | iTRAQ ratio | p-value  |
|---------------|-------------------------------------------------------------------------|-------------|----------|
| Q9NZN4        | EH domain-containing protein 2                                          | 8.0099      | 0.031923 |
| P06132        | Uroporphyrinogen decarboxylase                                          | 5.8747      | 0.016095 |
| P61026        | Ras-related protein Rab-10                                              | 3.439       | 0.005855 |
| Q9H078        | Caseinolytic peptidase B protein homolog                                | 2.7617      | 0.002846 |
| Q16134        | Electron transfer flavoprotein-ubiquinone oxidoreductase, mitochondrial | 2.9526      | 0.030664 |
| P49590        | Probable histidine--tRNA ligase, mitochondrial                          | 2.3891      | 0.002177 |
| Q8N2F6        | Armadillo repeat-containing protein 10                                  | 2.2024      | 0.000134 |
| Q9Y276        | Mitochondrial chaperone BCS1                                            | 2.0494      | 0.000153 |
| Q14376        | UDP-glucose 4-epimerase                                                 | 2.0395      | 0.009034 |
| O96019        | Actin-like protein 6A                                                   | 2.0094      | 0.007761 |
| Q7Z7F7        | 39S ribosomal protein L55, mitochondrial                                | 1.92        | 0.000000 |
| Q96AT9        | Ribulose-phosphate 3-epimerase                                          | 2.055       | 0.024096 |
| A8MT69        | Centromere protein X                                                    | 1.955       | 0.007304 |
| Q9NZI7        | Upstream-binding protein 1                                              | 1.9615      | 0.010251 |
| P61916        | Epididymal secretory protein E1                                         | 1.84        | 0.000746 |
| O00764        | Pyridoxal kinase                                                        | 1.7631      | 0.000002 |
| Q68E01        | Integrator complex subunit 3                                            | 1.7461      | 0.000000 |
| P33240        | Cleavage stimulation factor subunit 2                                   | 1.7262      | 0.013726 |
| P62714        | Serine/threonine-protein phosphatase 2A catalytic subunit beta isoform  | 1.6934      | 0.006006 |

|        |                                                                         |        |          |
|--------|-------------------------------------------------------------------------|--------|----------|
| Q5T3I0 | G patch domain-containing protein 4                                     | 1.7312 | 0.032666 |
| Q6P2E9 | Enhancer of mRNA-decapping protein 4                                    | 1.6454 | 0.005915 |
| O95400 | CD2 antigen cytoplasmic tail-binding protein 2                          | 1.6068 | 0.000281 |
| Q9GZS3 | WD repeat-containing protein 61                                         | 1.6132 | 0.018229 |
| O95801 | Tetratricopeptide repeat protein 4                                      | 1.5976 | 0.019642 |
| Q9Y4E8 | Ubiquitin carboxyl-terminal hydrolase 15                                | 1.5921 | 0.017035 |
| O75607 | Nucleoplasmin-3                                                         | 1.5703 | 0.005650 |
| Q9ULC4 | Malignant T-cell-amplified sequence 1                                   | 1.5265 | 0.002768 |
| Q9Y5K5 | Ubiquitin carboxyl-terminal hydrolase isozyme L5                        | 1.5531 | 0.028656 |
| Q12830 | Nucleosome-remodeling factor subunit BPTF                               | 1.5603 | 0.048384 |
| P67775 | Serine/threonine-protein phosphatase 2A catalytic subunit alpha isoform | 1.5494 | 0.039233 |
| O00217 | NADH dehydrogenase [ubiquinone] iron-sulfur protein 8, mitochondrial    | 1.5025 | 0.000408 |
| O43709 | Uncharacterized methyltransferase WBSR22                                | 1.4841 | 0.011058 |
| P18858 | DNA ligase 1                                                            | 1.4794 | 0.008162 |
| P43490 | Nicotinamide phosphoribosyltransferase                                  | 1.4622 | 0.000115 |
| P04899 | Guanine nucleotide-binding protein G(i) subunit alpha-2                 | 1.4635 | 0.004454 |
| Q96P70 | Importin-9                                                              | 1.4478 | 0.003815 |
| Q9Y450 | HBS1-like protein                                                       | 1.4335 | 0.000006 |
| Q96BM9 | ADP-ribosylation factor-like protein 8A                                 | 1.4289 | 0.000006 |
| Q9Y2A7 | Nck-associated protein 1                                                | 1.4608 | 0.048551 |
| Q9P0J0 | NADH dehydrogenase [ubiquinone] 1 alpha subcomplex subunit 13           | 1.4147 | 0.001202 |
| Q9NQ29 | Putative RNA-binding protein Luc7-like 1                                | 1.4168 | 0.002457 |
| P11021 | 78 kDa glucose-regulated protein                                        | 1.4064 | 0.000004 |
| P14854 | Cytochrome c oxidase subunit 6B1                                        | 1.4449 | 0.047485 |
| P11310 | Medium-chain specific acyl-CoA dehydrogenase, mitochondrial             | 1.4338 | 0.035329 |
| P30043 | Flavin reductase (NADPH)                                                | 1.4039 | 0.003508 |
| Q2NL82 | Pre-rRNA-processing protein TSR1 homolog                                | 1.3871 | 0.010745 |
| P50552 | Vasodilator-stimulated phosphoprotein                                   | 1.3727 | 0.000013 |
| O43795 | Unconventional myosin-Ib                                                | 1.3755 | 0.002744 |
| Q9H0S4 | Probable ATP-dependent RNA helicase DDX47                               | 1.3934 | 0.034110 |
| P36871 | Phosphoglucomutase-1                                                    | 1.3642 | 0.000000 |
| P46926 | Glucosamine-6-phosphate isomerase 1                                     | 1.3657 | 0.004824 |
| O15269 | Serine palmitoyltransferase 1                                           | 1.3818 | 0.038490 |
| Q9NQ88 | Fructose-2,6-bisphosphatase TIGAR                                       | 1.3613 | 0.007543 |
| Q5VYK3 | Proteasome-associated protein ECM29 homolog                             | 1.3519 | 0.000153 |
| P61960 | Ubiquitin-fold modifier 1                                               | 1.3437 | 0.000002 |
| O15173 | Membrane-associated progesterone receptor component 2                   | 1.3429 | 0.000932 |
| Q96T88 | E3 ubiquitin-protein ligase UHRF1                                       | 1.3357 | 0.000418 |
| Q96I99 | Succinyl-CoA ligase [GDP-forming] subunit beta, mitochondrial           | 1.3365 | 0.002639 |
| P62249 | 40S ribosomal protein S16                                               | 1.3293 | 0.000006 |

|        |                                             |        |          |
|--------|---------------------------------------------|--------|----------|
| P09669 | Cytochrome c oxidase subunit 6C             | 1.3339 | 0.004204 |
| O15145 | Actin-related protein 2/3 complex subunit 3 | 1.3316 | 0.002179 |

**Table S2** down-regulated proteins list

| Accession No. | Name                                                                           | iTRAQ ratio | p-value  |
|---------------|--------------------------------------------------------------------------------|-------------|----------|
| P51648        | Fatty aldehyde dehydrogenase                                                   | 0.7774      | 0.027189 |
| Q8IWA0        | WD repeat-containing protein 75                                                | 0.769       | 0.001687 |
| O95139        | NADH dehydrogenase [ubiquinone] 1 beta subcomplex subunit 6                    | 0.7705      | 0.006713 |
| O14981        | TATA-binding protein-associated factor 172                                     | 0.7768      | 0.043901 |
| P05386        | 60S acidic ribosomal protein P1                                                | 0.7733      | 0.026063 |
| Q9NPJ3        | Acyl-coenzyme A thioesterase 13                                                | 0.7512      | 0.000160 |
| Q9UBI1        | COMM domain-containing protein 3                                               | 0.7509      | 0.000084 |
| Q15102        | Platelet-activating factor acetylhydrolase IB subunit gamma                    | 0.7508      | 0.000159 |
| P38606        | V-type proton ATPase catalytic subunit A                                       | 0.7535      | 0.018759 |
| Q96ST2        | Protein IWS1 homolog                                                           | 0.7552      | 0.026231 |
| P49189        | 4-trimethylaminobutyraldehyde dehydrogenase                                    | 0.7572      | 0.041505 |
| Q8TEX9        | Importin-4                                                                     | 0.7508      | 0.026374 |
| O60610        | Protein diaphanous homolog 1                                                   | 0.7502      | 0.024978 |
| P49327        | Fatty acid synthase                                                            | 0.7498      | 0.021100 |
| Q6ZRP7        | Sulfhydryl oxidase 2                                                           | 0.7354      | 0.000089 |
| Q16204        | Coiled-coil domain-containing protein 6                                        | 0.7347      | 0.002975 |
| Q9NY33        | Dipeptidyl peptidase 3                                                         | 0.734       | 0.003457 |
| P30837        | Aldehyde dehydrogenase X, mitochondrial                                        | 0.7382      | 0.034906 |
| P99999        | Cytochrome c                                                                   | 0.7371      | 0.031762 |
| Q16836        | Hydroxyacyl-coenzyme A dehydrogenase, mitochondrial                            | 0.7318      | 0.038739 |
| O75616        | GTPase Era, mitochondrial                                                      | 0.7262      | 0.028356 |
| P52655        | Transcription initiation factor IIA subunit 1                                  | 0.7184      | 0.006370 |
| Q9Y520        | Protein PRRC2C                                                                 | 0.717       | 0.006595 |
| Q96GA7        | Serine dehydratase-like                                                        | 0.714       | 0.010163 |
| Q9H0U4        | Ras-related protein Rab-1B                                                     | 0.7057      | 0.019173 |
| Q92688        | Acidic leucine-rich nuclear phosphoprotein 32 family member B                  | 0.6911      | 0.000237 |
| Q8NF37        | Lysophosphatidylcholine acyltransferase 1                                      | 0.7038      | 0.021787 |
| Q9Y5Y2        | Cytosolic Fe-S cluster assembly factor NUBP2                                   | 0.6955      | 0.005161 |
| Q8IY37        | Probable ATP-dependent RNA helicase DHX37                                      | 0.6903      | 0.001066 |
| Q96JB5        | CDK5 regulatory subunit-associated protein 3                                   | 0.7059      | 0.049627 |
| O14776        | Transcription elongation regulator 1                                           | 0.6974      | 0.025789 |
| Q8TEM1        | Nuclear pore membrane glycoprotein 210                                         | 0.6819      | 0.002978 |
| O95340        | Bifunctional 3'-phosphoadenosine 5'-phosphosulfate synthase 2                  | 0.6747      | 0.000536 |
| Q9ULC5        | Long-chain-fatty-acid--CoA ligase 5                                            | 0.6803      | 0.016438 |
| Q9Y6H1        | Coiled-coil-helix-coiled-coil-helix domain-containing protein 2, mitochondrial | 0.6784      | 0.022056 |

|        |                                                                  |        |          |
|--------|------------------------------------------------------------------|--------|----------|
| Q8IX18 | Probable ATP-dependent RNA helicase DHX40                        | 0.6584 | 0.000307 |
| Q96TA1 | Niban-like protein 1                                             | 0.6732 | 0.034846 |
| P21399 | Cytoplasmic aconitate hydratase                                  | 0.6614 | 0.026080 |
| O43719 | HIV Tat-specific factor 1                                        | 0.6465 | 0.020424 |
| O60684 | Importin subunit alpha-7                                         | 0.6352 | 0.010637 |
| P19525 | Interferon-induced, double-stranded RNA-activated protein kinase | 0.6415 | 0.027415 |
| Q9UPN3 | Microtubule-actin cross-linking factor 1, isoforms 1/2/3/5       | 0.6505 | 0.048222 |
| P30626 | Sorcin                                                           | 0.6154 | 0.000122 |
| Q15021 | Condensin complex subunit 1                                      | 0.6089 | 0.000002 |
| Q9NRP0 | Oligosaccharyltransferase complex subunit OSTC                   | 0.5903 | 0.000084 |
| Q14657 | L antigen family member 3                                        | 0.5976 | 0.024880 |
| Q15269 | Periodic tryptophan protein 2 homolog                            | 0.5975 | 0.030609 |
| Q9UQ88 | Cyclin-dependent kinase 11A                                      | 0.5672 | 0.002369 |
| Q6L8Q7 | 2',5'-phosphodiesterase 12                                       | 0.5641 | 0.015498 |
| Q9BU14 | DNA-directed RNA polymerase III subunit RPC3                     | 0.5729 | 0.033112 |
| P19838 | Nuclear factor NF-kappa-B p105 subunit                           | 0.5539 | 0.013372 |
| Q9UET6 | Putative ribosomal RNA methyltransferase 1                       | 0.553  | 0.031663 |
| Q8N9T8 | Protein KR11 homolog                                             | 0.4955 | 0.000170 |
| Q9BVI4 | Nucleolar complex protein 4 homolog                              | 0.4787 | 0.000754 |
| Q8TED0 | U3 small nucleolar RNA-associated protein 15 homolog             | 0.4813 | 0.004463 |
| P26196 | Probable ATP-dependent RNA helicase DDX6                         | 0.4832 | 0.009561 |
| Q9H2P9 | Diphthine synthase                                               | 0.4322 | 0.007755 |
| Q9NRY5 | Protein FAM114A2                                                 | 0.4207 | 0.008607 |
| Q3ZCQ8 | Mitochondrial import inner membrane translocase subunit TIM50    | 0.4104 | 0.030059 |
| Q8N183 | Mimitin, mitochondrial                                           | 0.367  | 0.013408 |
| P82675 | 28S ribosomal protein S5, mitochondrial                          | 0.3353 | 0.003648 |
| Q9HA64 | Ketosamine-3-kinase                                              | 0.1756 | 0.000305 |
